# Supplementary material
Source: PubMed Central journal article supplement (PMC2736553)

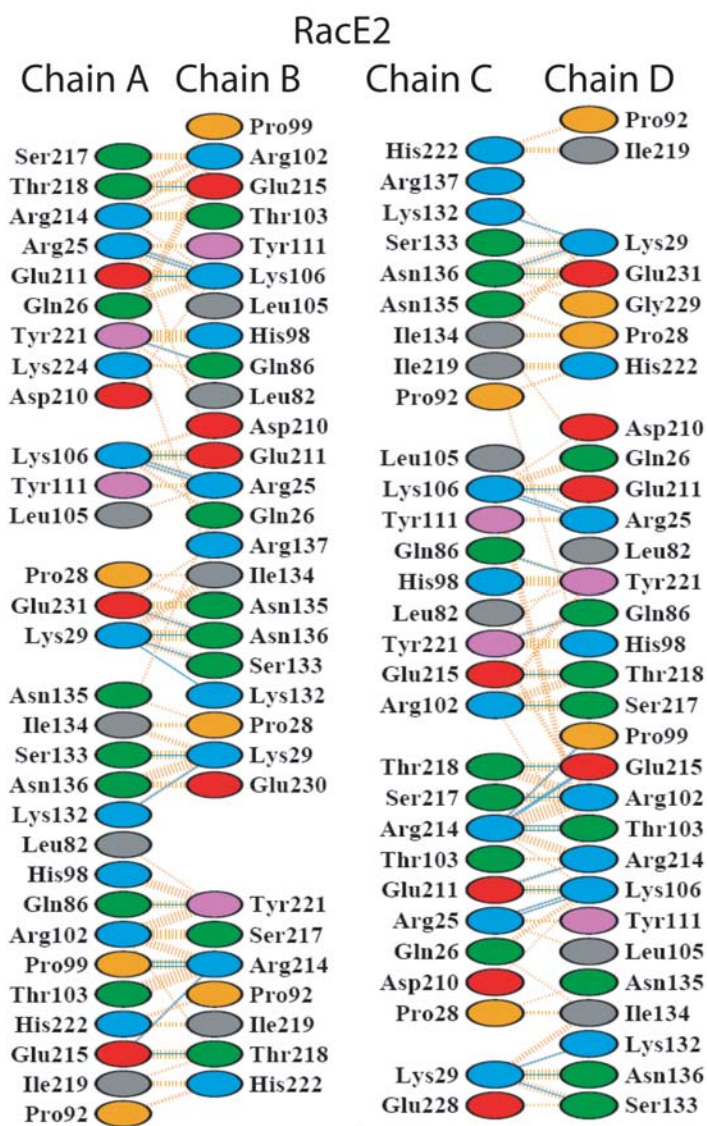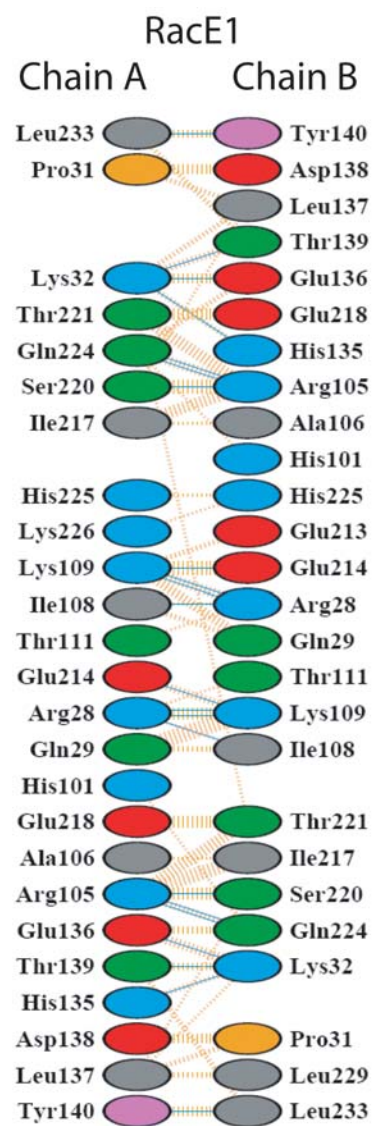

Supplement: NIHMS29039-supplement-01.pdf [file NIHMS29039-supplement-01.pdf]
